# Supplementary material for: Population-scale analysis of common and rare genetic variation associated with hearing loss in adults
Source: bioRxiv or medRxiv preprint supplement (doi:10.1101/2021.09.27.21264091), 2021-10-11
Supplement: Supplementary file [file media-3.pdf]

**SUPPLEMENTAL FILE 2.**

**Praveen et al.**

**Supplementary Figure 2: Regional plots for novel common (MAF  $\geq 1\%$ ) loci identified in hearing loss meta-analysis and forest plots corresponding to the index variant at each novel locus. (Panels A through R, pages 1-9.)**

**A**

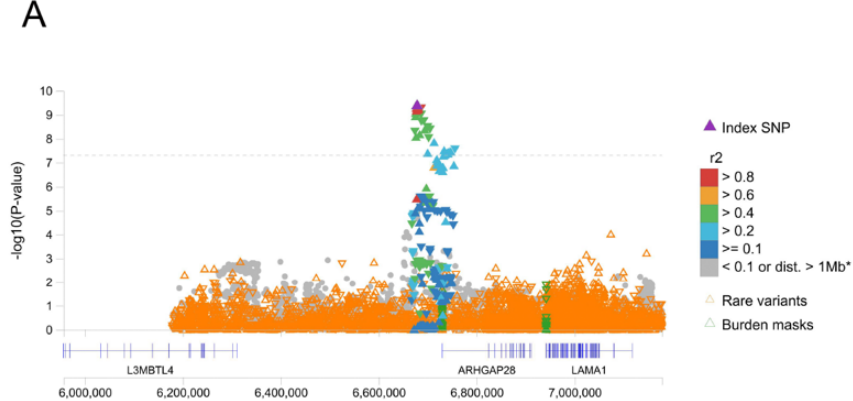

**Association with 18:6678716:T:A**

| STUDY       | N CASES<br>RR RA AA      | N CONTROLS<br>RR RA AA      | OR [95% CI]                | PVALUE         | AAF         |
|-------------|--------------------------|-----------------------------|----------------------------|----------------|-------------|
| UKB         | 27707 52818 25309        | 56254 105268 49118          | 1.025 [1.014,1.036]        | 6.6e-06        | 0.485       |
| GHS         | 2313 4796 2384           | 24697 49910 24787           | 1.019 [0.986,1.052]        | 0.26           | 0.49        |
| MALMO       | 102 259 139              | 6266 13459 7387             | 1.082 [0.949,1.233]        | 0.24           | 0.512       |
| SINAI       | 72 155 87                | 2589 4998 2437              | 1.162 [0.98,1.378]         | 0.083          | 0.484       |
| FinnGen     | 2340 4803 2464           | 32356 61113 28856           | 1.086 [1.054,1.12]         | 1.1e-07        | 0.565       |
| <b>META</b> | <b>32534 62831 30383</b> | <b>122162 234748 112585</b> | <b>1.031 [1.021,1.042]</b> | <b>4.3e-10</b> | <b>0.49</b> |

**B**

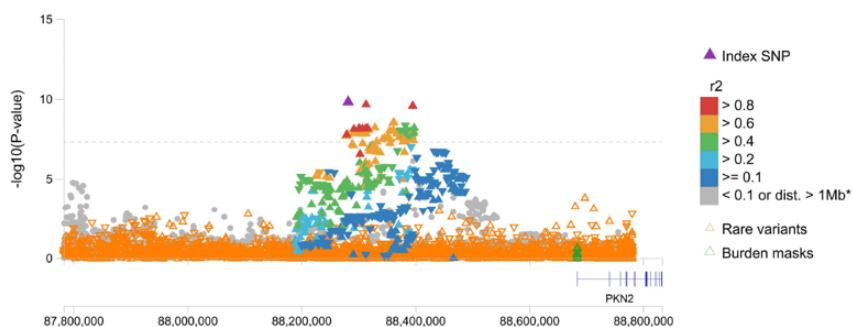

**Association with 1:88282464:G:A**

| STUDY       | N CASES<br>RR RA AA     | N CONTROLS<br>RR RA AA     | OR [95% CI]                | PVALUE         | AAF          |
|-------------|-------------------------|----------------------------|----------------------------|----------------|--------------|
| UKB         | 8159 42859 54816        | 17370 86039 107231         | 1.036 [1.024,1.049]        | 6.1e-09        | 0.716        |
| GHS         | 706 3759 5028           | 7909 39801 51684           | 1.04 [1.004,1.077]         | 0.031          | 0.717        |
| MALMO       | 48 217 235              | 2597 11506 13009           | 0.986 [0.859,1.133]        | 0.85           | 0.684        |
| SINAI       | 17 107 190              | 577 3560 5887              | 1.049 [0.851,1.294]        | 0.65           | 0.738        |
| FinnGen     | 794 3936 4877           | 10524 50713 61088          | 1.028 [0.996,1.062]        | 0.084          | 0.656        |
| <b>META</b> | <b>9724 50878 65146</b> | <b>38977 191619 238899</b> | <b>1.036 [1.024,1.047]</b> | <b>1.6e-10</b> | <b>0.714</b> |

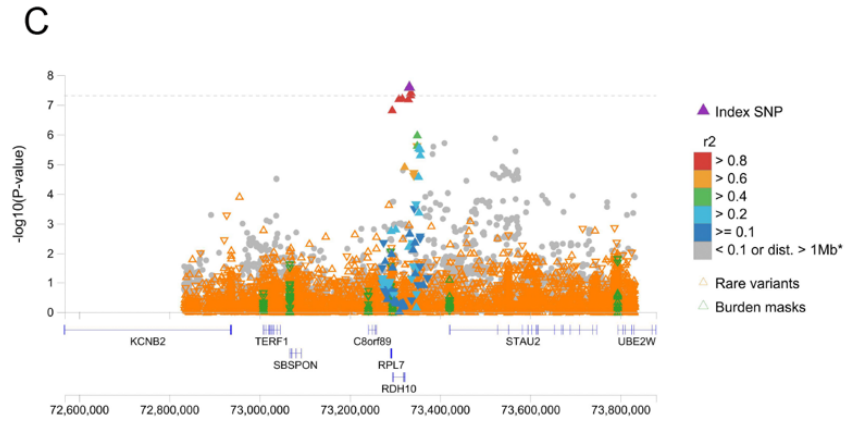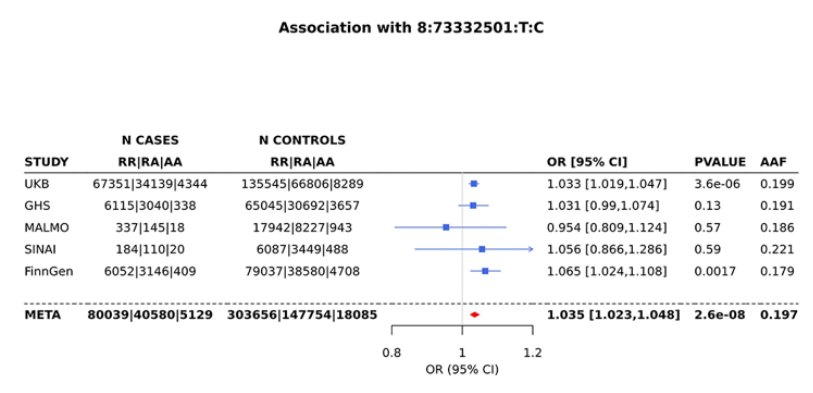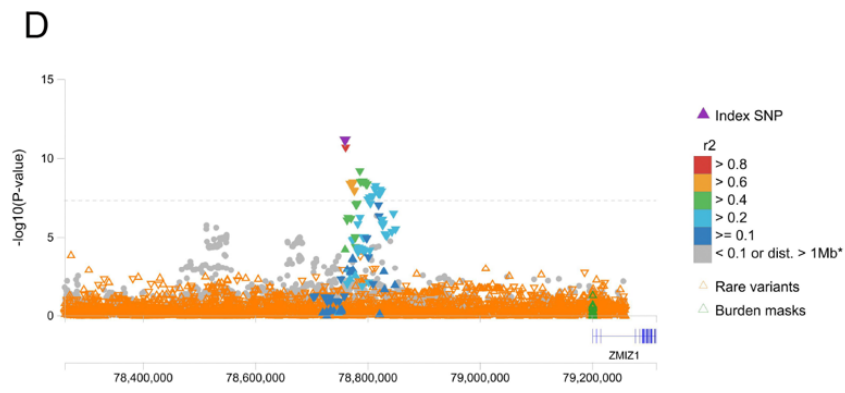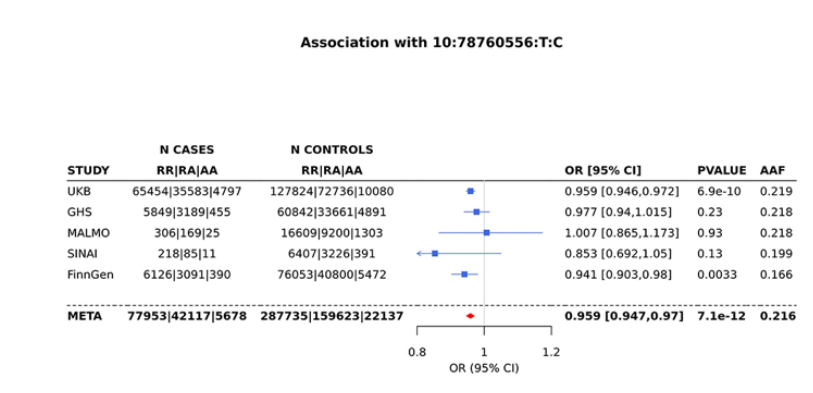

E

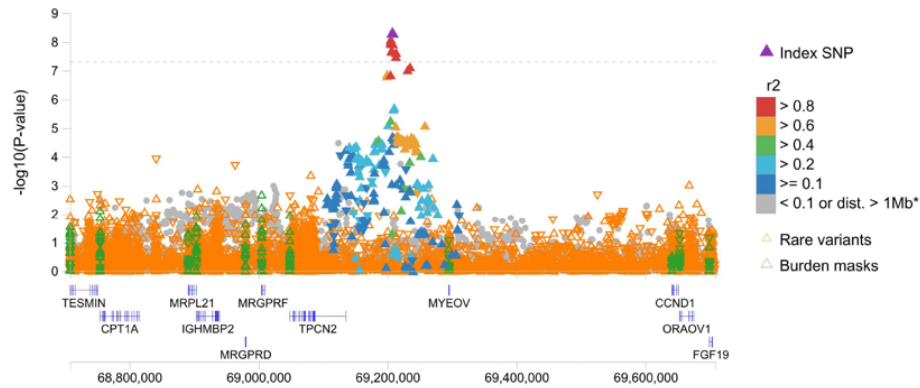

Association with 11:69208057:T:C

| STUDY       | N CASES      |                    | N CONTROLS   |                      | OR [95% CI]              | PVALUE         | AAF          |
|-------------|--------------|--------------------|--------------|----------------------|--------------------------|----------------|--------------|
|             | RR           | RA AA              | RR           | RA AA                |                          |                |              |
| UKB         | 15357        | 49729 40748        | 31512        | 99753 79375          | 1.031 [1.02,1.043]       | 7.1e-08        | 0.616        |
| GHS         | 1285         | 4431 3777          | 14133        | 46571 38690          | 1.041 [1.008,1.076]      | 0.015          | 0.622        |
| MALMO       | 74           | 257 169            | 4061         | 12819 10232          | 0.925 [0.813,1.053]      | 0.24           | 0.611        |
| SINAI       | 35           | 143 136            | 1246         | 4417 4361            | 0.978 [0.822,1.164]      | 0.81           | 0.648        |
| FinnGen     | 1375         | 4519 3713          | 17939        | 57811 46575          | 1.02 [0.988,1.053]       | 0.23           | 0.658        |
| <b>META</b> | <b>18126</b> | <b>59079 48543</b> | <b>68891</b> | <b>221371 179233</b> | <b>1.03 [1.02,1.041]</b> | <b>5.4e-09</b> | <b>0.618</b> |

F

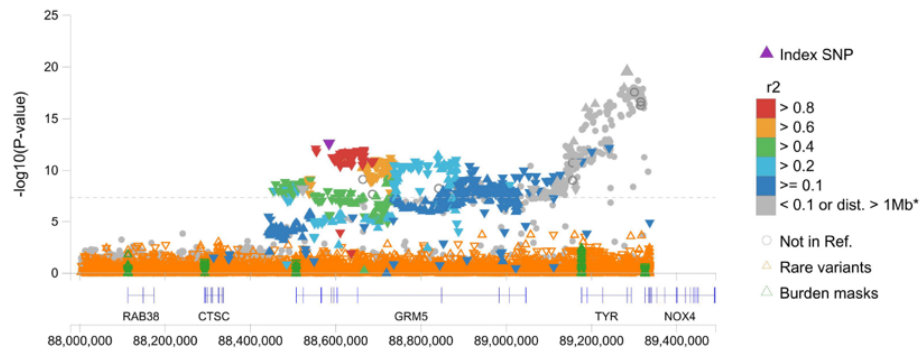

Association with 11:88585758:A:G

| STUDY       | N CASES      |                   | N CONTROLS    |                     | OR [95% CI]               | PVALUE         | AAF         |
|-------------|--------------|-------------------|---------------|---------------------|---------------------------|----------------|-------------|
|             | RR           | RA AA             | RR            | RA AA               |                           |                |             |
| UKB         | 72997        | 29769 3068        | 143206        | 60935 6499          | 0.954 [0.94,0.968]        | 1.2e-10        | 0.174       |
| GHS         | 6796         | 2451 246          | 69389         | 27358 2647          | 0.934 [0.894,0.975]       | 0.0019         | 0.163       |
| FinnGen     | 6792         | 2571 243          | 85262         | 33728 3335          | 0.957 [0.912,1.004]       | 0.073          | 0.113       |
| <b>META</b> | <b>86585</b> | <b>34791 3557</b> | <b>297857</b> | <b>122021 12481</b> | <b>0.952 [0.94,0.965]</b> | <b>2.7e-13</b> | <b>0.17</b> |

G

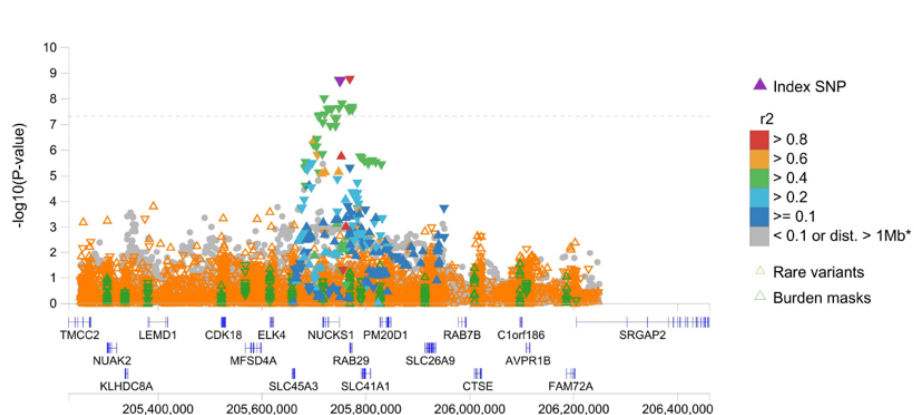

Association with 1:205751355:G:A

| STUDY       | N CASES                  |  | N CONTROLS                 |  | OR [95% CI]               | PVALUE       | AAF          |
|-------------|--------------------------|--|----------------------------|--|---------------------------|--------------|--------------|
|             | RR RA AA                 |  | RR RA AA                   |  |                           |              |              |
| UKB         | 22164 52368 31302        |  | 42556 104212 63872         |  | 0.969 [0.959,0.98]        | 2.1e-08      | 0.548        |
| GHS         | 1893 4664 2936           |  | 19127 48859 31408          |  | 0.965 [0.934,0.996]       | 0.026        | 0.558        |
| MALMO       | 89 240 171               |  | 5396 13374 8342            |  | 1.12 [0.985,1.273]        | 0.083        | 0.548        |
| SINAI       | 62 147 105               |  | 1739 4965 3320             |  | 0.983 [0.825,1.171]       | 0.85         | 0.566        |
| FinnGen     | 2086 4781 2739           |  | 25957 60784 35585          |  | 0.979 [0.949,1.009]       | 0.17         | 0.582        |
| <b>META</b> | <b>26294 62200 37253</b> |  | <b>94775 232194 142527</b> |  | <b>0.971 [0.961,0.98]</b> | <b>2e-09</b> | <b>0.549</b> |

H

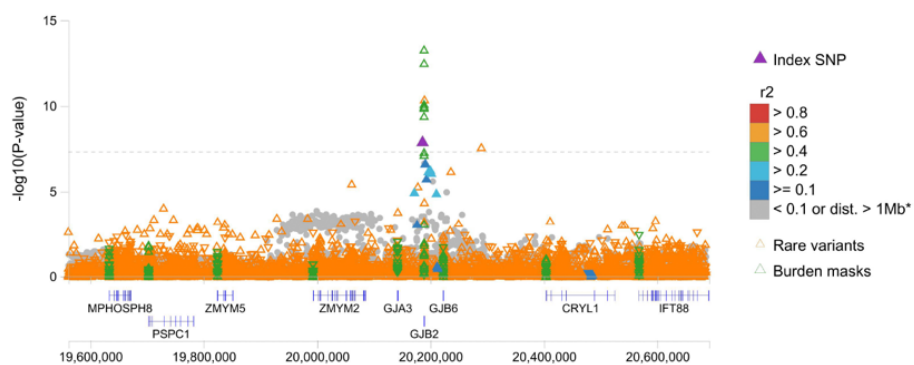

Association with 13:20186225:A:T

| STUDY       | N CASES               |  | N CONTROLS              |  | OR [95% CI]                | PVALUE         | AAF          |
|-------------|-----------------------|--|-------------------------|--|----------------------------|----------------|--------------|
|             | RR RA AA              |  | RR RA AA                |  |                            |                |              |
| UKB         | 101833 3957 44        |  | 203340 7230 70          |  | 1.105 [1.059,1.152]        | 3.1e-06        | 0.018        |
| GHS         | 9083 402 8            |  | 95319 4042 33           |  | 1.066 [0.952,1.193]        | 0.27           | 0.022        |
| MALMO       | 483 16 1              |  | 26212 893 7             |  | 1.093 [0.657,1.819]        | 0.73           | 0.017        |
| SINAI       | 305 9 0               |  | 9724 299 1              |  | 0.991 [0.48,2.045]         | 0.98           | 0.019        |
| FinnGen     | 9244 359 3            |  | 118685 3613 27          |  | 1.279 [1.127,1.451]        | 0.00014        | 0.015        |
| <b>META</b> | <b>120948 4743 56</b> |  | <b>453280 16077 138</b> |  | <b>1.114 [1.073,1.156]</b> | <b>1.4e-08</b> | <b>0.018</b> |

I

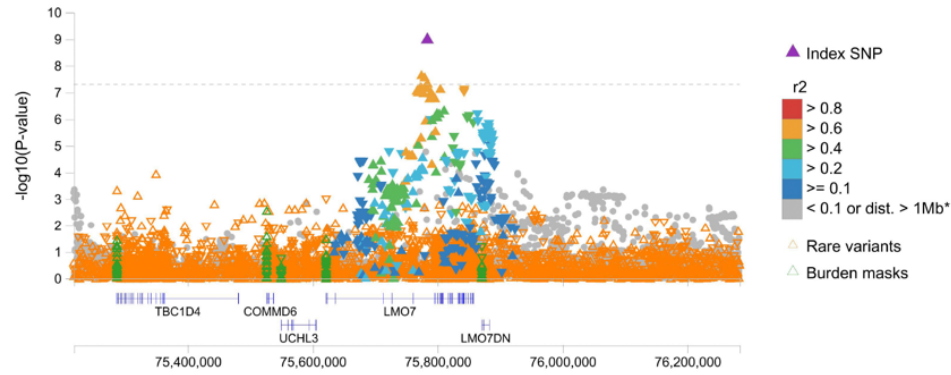

Association with 13:75783745:C:G

| STUDY       | N CASES                  |  | N CONTROLS                 |  | OR [95% CI]                | PVALUE         | AAF          |
|-------------|--------------------------|--|----------------------------|--|----------------------------|----------------|--------------|
|             | RR RA AA                 |  | RR RA AA                   |  |                            |                |              |
| UKB         | 34162 51780 19892        |  | 69302 102980 38358         |  | 1.029 [1.018,1.04]         | 3.3e-07        | 0.429        |
| GHS         | 3165 4608 1720           |  | 33472 48578 17344          |  | 1.023 [0.99,1.056]         | 0.17           | 0.418        |
| MALMO       | 163 235 102              |  | 8593 13357 5162            |  | 1.006 [0.884,1.143]        | 0.93           | 0.435        |
| SINAI       | 120 149 45               |  | 3910 4580 1534             |  | 1.044 [0.881,1.238]        | 0.62           | 0.379        |
| FinnGen     | 2956 4746 1904           |  | 39424 60042 22860          |  | 1.054 [1.023,1.087]        | 0.00069        | 0.432        |
| <b>META</b> | <b>40566 61518 23663</b> |  | <b>154701 229537 85258</b> |  | <b>1.031 [1.021,1.041]</b> | <b>1.1e-09</b> | <b>0.428</b> |

J

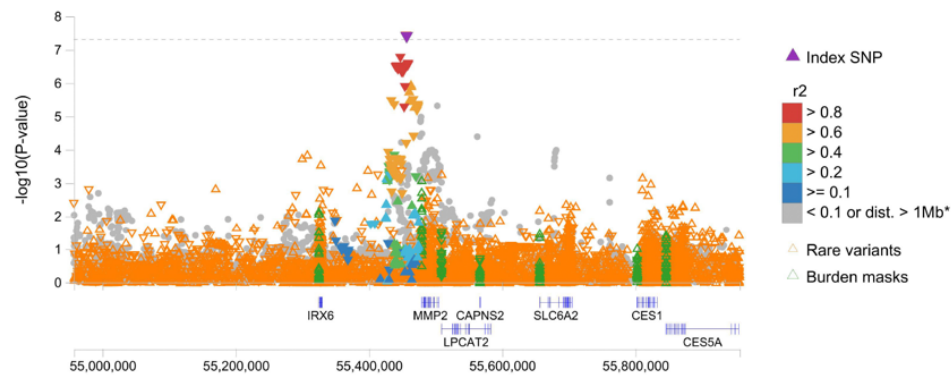

Association with 16:55456852:T:A

| STUDY       | N CASES                 |  | N CONTROLS                 |  | OR [95% CI]                | PVALUE         | AAF          |
|-------------|-------------------------|--|----------------------------|--|----------------------------|----------------|--------------|
|             | RR RA AA                |  | RR RA AA                   |  |                            |                |              |
| UKB         | 67703 33964 4167        |  | 133069 68867 8704          |  | 0.968 [0.955,0.981]        | 1.8e-06        | 0.203        |
| GHS         | 6009 3097 387           |  | 62233 32802 4359           |  | 0.973 [0.936,1.012]        | 0.17           | 0.207        |
| MALMO       | 319 163 18              |  | 17452 8622 1038            |  | 1.013 [0.862,1.19]         | 0.88           | 0.196        |
| SINAI       | 202 101 11              |  | 6337 3256 431              |  | 0.942 [0.769,1.154]        | 0.57           | 0.203        |
| FinnGen     | 6248 2999 359           |  | 77963 39388 4974           |  | 0.95 [0.913,0.988]         | 0.011          | 0.176        |
| <b>META</b> | <b>80481 40324 4942</b> |  | <b>297054 152935 19506</b> |  | <b>0.967 [0.955,0.978]</b> | <b>3.9e-08</b> | <b>0.203</b> |

K

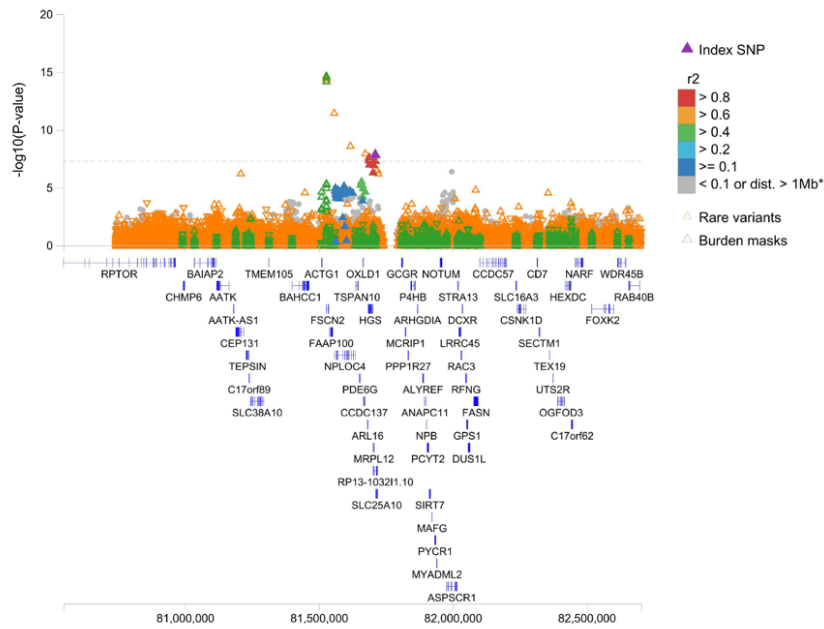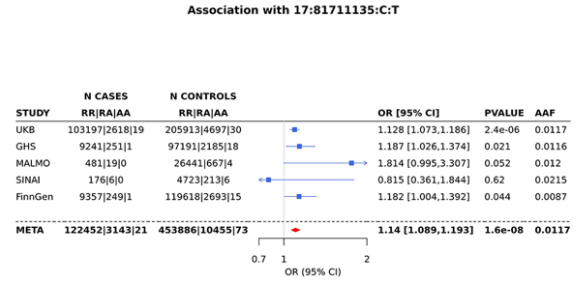

L

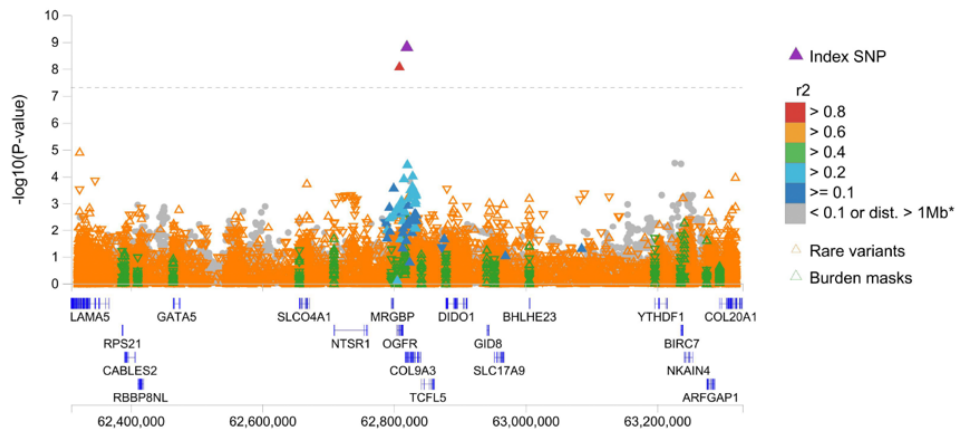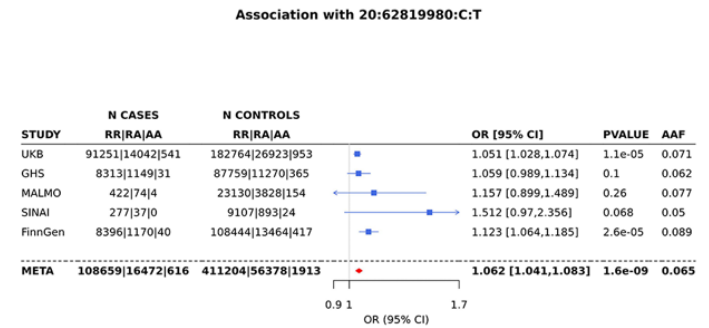

M

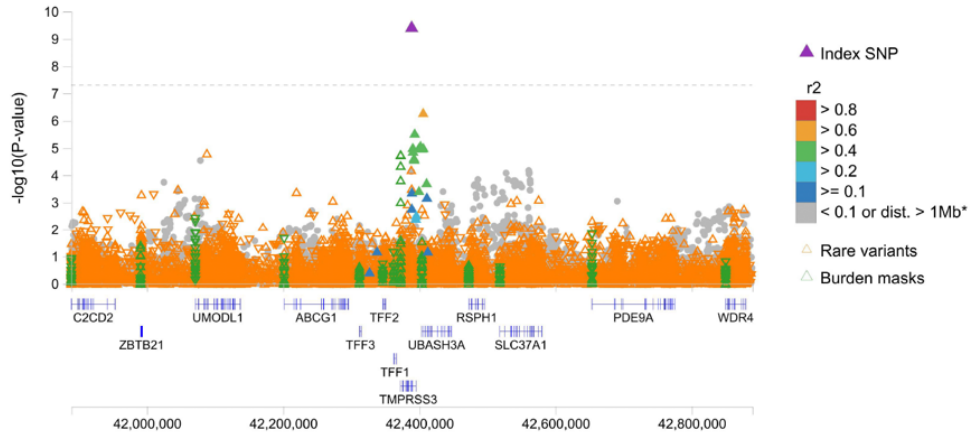

Association with 21:42388983:C:T

| STUDY       | N CASES                 |  | N CONTROLS               |  | OR [95% CI]               | PVALUE         | AAF          |
|-------------|-------------------------|--|--------------------------|--|---------------------------|----------------|--------------|
|             | RR RA AA                |  | RR RA AA                 |  |                           |                |              |
| UKB         | 94152 11343 339         |  | 188449 21605 586         |  | 1.058 [1.033,1.083]       | 3.1e-06        | 0.055        |
| GHS         | 8330 1127 36            |  | 88399 10685 310          |  | 1.104 [1.033,1.179]       | 0.0034         | 0.057        |
| MALMO       | 439 60 1                |  | 23966 3064 82            |  | 1.02 [0.782,1.332]        | 0.88           | 0.06         |
| SINAI       | 289 24 1                |  | 9278 731 15              |  | 1.115 [0.72,1.728]        | 0.63           | 0.038        |
| FinnGen     | 8491 1082 34            |  | 109834 12156 336         |  | 1.152 [1.07,1.239]        | 0.00016        | 0.044        |
| <b>META</b> | <b>111701 13636 411</b> |  | <b>419926 48241 1329</b> |  | <b>1.07 [1.048,1.093]</b> | <b>4.1e-10</b> | <b>0.055</b> |

N

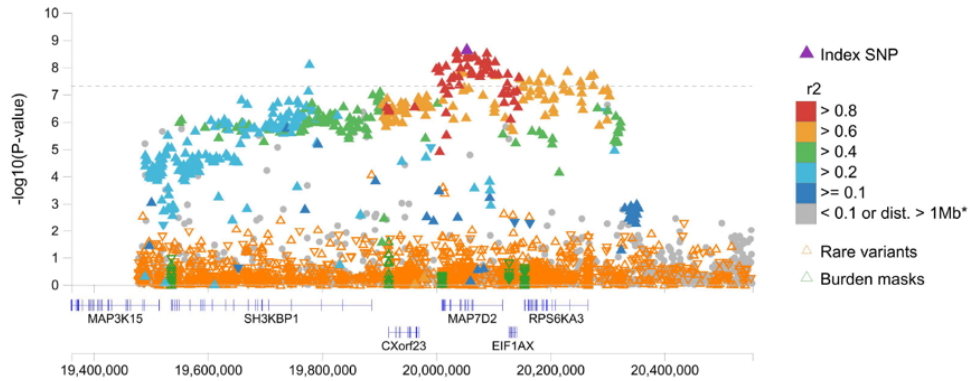

Association with 23:20054286:C:T

| STUDY       | N CASES                  |  | N CONTROLS                |  | OR [95% CI]                | PVALUE         | AAF          |
|-------------|--------------------------|--|---------------------------|--|----------------------------|----------------|--------------|
|             | RR RA AA                 |  | RR RA AA                  |  |                            |                |              |
| UKB         | 76576 15170 13890        |  | 149076 40051 21281        |  | 1.034 [1.022,1.045]        | 5.3e-09        | 0.199        |
| GHS         | 6746 1584 1163           |  | 69052 20344 9998          |  | 1.022 [0.989,1.057]        | 0.2            | 0.198        |
| MALMO       | 340 101 59               |  | 18629 5557 2926           |  | 1.04 [0.911,1.187]         | 0.56           | 0.204        |
| SINAI       | 211 70 33                |  | 6902 2062 1060            |  | 1.009 [0.836,1.217]        | 0.93           | 0.198        |
| <b>META</b> | <b>83873 16925 15145</b> |  | <b>243659 68014 35265</b> |  | <b>1.033 [1.022,1.044]</b> | <b>2.4e-09</b> | <b>0.201</b> |

O

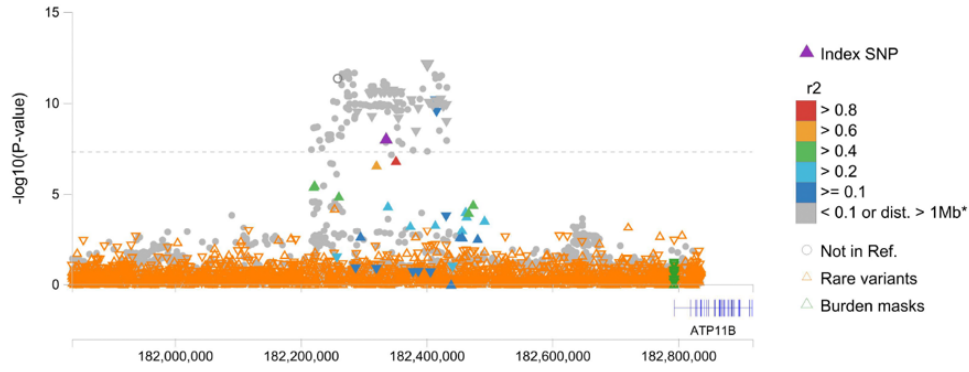

Association with 3:182336158:A:G

| STUDY       | N CASES      |                   | N CONTROLS    |                     | OR [95% CI]               | PVALUE         | AAF          |
|-------------|--------------|-------------------|---------------|---------------------|---------------------------|----------------|--------------|
|             | RR           | RA AA             | RR            | RA AA               |                           |                |              |
| UKB         | 73588        | 29411 2835        | 148654        | 56467 5519          | 1.045 [1.03,1.061]        | 5e-09          | 0.162        |
| GHS         | 6811         | 2441 241          | 71154         | 25869 2371          | 0.98 [0.938,1.025]        | 0.38           | 0.154        |
| MALMO       | 166          | 72 7              | 9985          | 3307 278            | 1.376 [1.073,1.765]       | 0.012          | 0.146        |
| SINAI       | 250          | 59 5              | 8007          | 1888 129            | 1.078 [0.808,1.437]       | 0.61           | 0.115        |
| FinnGen     | 6790         | 2573 243          | 87617         | 31820 2889          | 1.043 [0.997,1.092]       | 0.068          | 0.131        |
| <b>META</b> | <b>87605</b> | <b>34556 3331</b> | <b>325417</b> | <b>119351 11186</b> | <b>1.04 [1.026,1.054]</b> | <b>1.1e-08</b> | <b>0.157</b> |

P

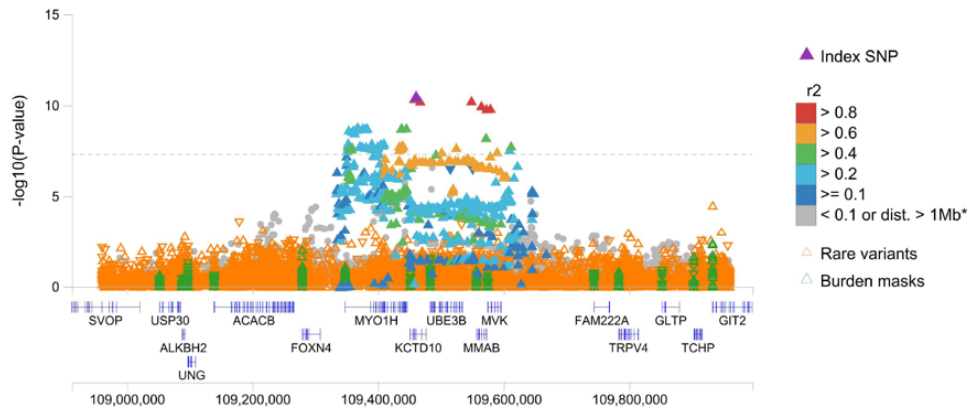

Association with 12:109460927:A:G

| STUDY       | N CASES      |                    | N CONTROLS    |                     | OR [95% CI]                | PVALUE         | AAF          |
|-------------|--------------|--------------------|---------------|---------------------|----------------------------|----------------|--------------|
|             | RR           | RA AA              | RR            | RA AA               |                            |                |              |
| UKB         | 32469        | 52272 21093        | 66442         | 103544 40654        | 1.034 [1.023,1.045]        | 1.9e-09        | 0.441        |
| GHS         | 2653         | 4798 2042          | 28712         | 49392 21290         | 1.036 [1.003,1.069]        | 0.031          | 0.462        |
| MALMO       | 162          | 244 94             | 8351          | 13404 5357          | 0.944 [0.831,1.072]        | 0.37           | 0.443        |
| SINAI       | 74           | 162 78             | 2841          | 4861 2322           | 1.105 [0.938,1.302]        | 0.23           | 0.473        |
| FinnGen     | 2891         | 4758 1957          | 37775         | 60404 24147         | 1.029 [0.998,1.061]        | 0.069          | 0.409        |
| <b>META</b> | <b>38249</b> | <b>62234 25264</b> | <b>144121</b> | <b>231605 93770</b> | <b>1.033 [1.023,1.044]</b> | <b>4.1e-11</b> | <b>0.447</b> |



Q

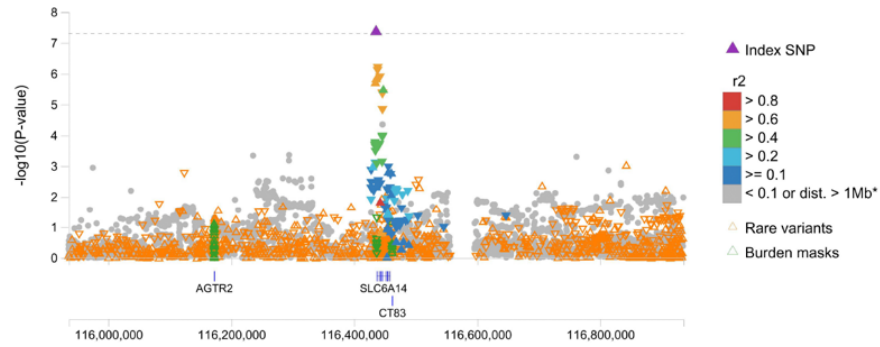

Association with 23:116435671:G:A

| STUDY       | N CASES<br>RR RA AA      | N CONTROLS<br>RR RA AA     | OR [95% CI]                | PVALUE         | AAF          |
|-------------|--------------------------|----------------------------|----------------------------|----------------|--------------|
| UKB         | 27000 21427 57209        | 47233 58896 104279         | 1.024 [1.015,1.034]        | 5.3e-07        | 0.638        |
| GHS         | 2337 2252 4904           | 22577 28829 47988          | 1.033 [1.006,1.061]        | 0.018          | 0.629        |
| MALMO       | 92 157 251               | 4628 9573 12911            | 1.014 [0.892,1.153]        | 0.83           | 0.644        |
| SINAI       | 50 84 180                | 1280 2928 5816             | 0.939 [0.785,1.124]        | 0.49           | 0.702        |
| <b>META</b> | <b>29479 23920 62544</b> | <b>75718 100226 170994</b> | <b>1.025 [1.016,1.034]</b> | <b>4.4e-08</b> | <b>0.639</b> |

R

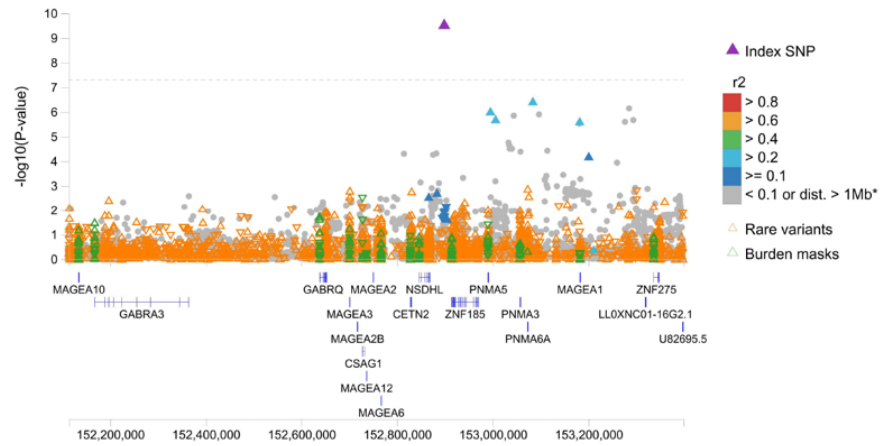

Association with 23:152898837:T:C

| STUDY       | N CASES<br>RR RA AA     | N CONTROLS<br>RR RA AA   | OR [95% CI]                | PVALUE         | AAF          |
|-------------|-------------------------|--------------------------|----------------------------|----------------|--------------|
| UKB         | 100567 3127 1942        | 200300 7689 2419         | 1.086 [1.057,1.114]        | 8e-10          | 0.031        |
| GHS         | 8982 347 164            | 94138 3988 1268          | 1.067 [0.991,1.149]        | 0.087          | 0.034        |
| MALMO       | 477 16 7                | 25840 1005 267           | 1.035 [0.744,1.44]         | 0.84           | 0.029        |
| SINAI       | 295 11 8                | 9360 462 202             | 0.885 [0.633,1.235]        | 0.47           | 0.046        |
| <b>META</b> | <b>110321 3501 2121</b> | <b>329638 13144 4156</b> | <b>1.082 [1.056,1.109]</b> | <b>3.1e-10</b> | <b>0.032</b> |
